# Supplementary material for: Comparison of cardiac CT angiography coronary artery dimensions and ethnicity in Trinidad: the CADET pilot study
Source: HighWire-hosted journal article supplement (doi:10.1136/openhrt-2021-001922), 2022-03-01
Supplement: openhrt-2021-001922supp001_data_supplement.pdf [file openhrt-2021-001922supp001_data_supplement.pdf]

| Characteristics                                            | Frequency (%)                                 |
|------------------------------------------------------------|-----------------------------------------------|
| Age                                                        | 50.7 years                                    |
| Gender<br>Male<br>Female                                   | 61 (36)<br>109 (64)                           |
| Ethnicity<br>South Asian<br>Caribbean Black<br>Interracial | 85 (50)<br>67 (39)<br>18 (11)                 |
| Body Mass Index (BMI)<br>Body Surface Area (BSA)           | 26.5 kg/m <sup>2</sup><br>1.81 m <sup>2</sup> |

|                                              |         |
|----------------------------------------------|---------|
| Comorbidities                                |         |
| Prior Myocardial Infarction (MI)             | 0 (0)   |
| Diabetes Mellitus (DM)                       | 26 (15) |
| Hypertension (HTN)                           | 72 (42) |
| Dyslipidemia                                 | 58 (34) |
| Chronic Kidney Disease (CKD)                 | 0 (0)   |
| Cerebrovascular Events (CVE)                 | 0 (0)   |
| Chronic Obstructive Pulmonary Disease (COPD) | 0 (0)   |
| Peripheral Artery Disease (PAD)              | 0 (0)   |

|                                                                                                                      |         |
|----------------------------------------------------------------------------------------------------------------------|---------|
| Cardiovascular Medications                                                                                           |         |
| Aspirin                                                                                                              | 42 (25) |
| Clopidogrel                                                                                                          | 11 (6)  |
| Angiotensin-Converting Enzyme<br>Inhibitor, Angiotensin Receptor<br>Blocker, Neprilysin Inhibitor (ACEi,<br>ARB, Ni) | 32 (19) |
| Beta-Blocker (BB)                                                                                                    | 12 (7)  |
| Statin                                                                                                               | 43 (25) |
| Mineralocorticoid Receptor<br>Antagonist (MRA)                                                                       | 0 (0)   |
| Calcium Channel Blocker (CCB)                                                                                        | 27 (16) |
| Nitrates                                                                                                             | 6 (4)   |
| Ivabradine                                                                                                           | 0 (0)   |
| Trimetazidine                                                                                                        | 0 (0)   |

|                                                      |         |
|------------------------------------------------------|---------|
| Diabetic Medications                                 |         |
| Insulins                                             | 4 (2)   |
| Oral Hypoglycemics                                   |         |
| Metformin                                            | 20 (12) |
| Sulfonylureas                                        | 4 (2)   |
| Glucagon-Like Peptide-1 Receptor Agonists (GLP-1RA)  | 0 (0)   |
| Dipeptidyl Peptidase-4 inhibitors (DPP-4i)           | 0 (0)   |
| Sodium-Glucose-Like Transporter-2 inhibitor (SGLT2i) | 0 (0)   |
| Coronary Artery Calcium (CAC) Score                  | 9.2     |
| Contrast Media Reaction                              |         |
| Mild                                                 | 11 (6)  |
| Moderate                                             | 0 (0)   |
| Severe                                               | 0 (0)   |
